# Supplementary material for: Cascading effects of predator activity on tick-borne disease risk
Source: PubMed Central journal article supplement (PMC5543215; doi:10.1098/rspb.2017.0453), 2017-07-19
Supplement: rspb20170453supp1.pdf [file rspb20170453supp1.pdf]

Supplementary material belonging to the manuscript: Hofmeester, T.R., Jansen, P.A., Wijnen, H.J., Coipan, E.C., Fonville, M., Prins, H.H.T., Sprong, H., and van Wieren, S.E. Cascading effects of predator activity on tick-borne disease risk. Proceedings of the Royal Society B: Biological sciences. DOI: 10.1098/rspb.2017.0453

Table S1. Characteristics of the research sites, and sampling effort (camera trap days).

| Site                            | Vegetation          |                                     | Coordinates <sup>b</sup> |            | Year | Effort (days)          |
|---------------------------------|---------------------|-------------------------------------|--------------------------|------------|------|------------------------|
|                                 | Overstory           | Undergrowth <sup>a</sup>            | Latitude                 | Longitude  |      |                        |
| Amsterdamse Waterleiding Duinen | Mixed forest        | <i>Calamagrostis epigejos</i>       | 52°20'36''N              | 4°33'58''E | 2014 | 492                    |
| Bergherbos                      | Mixed forest        | <i>Deschampsia flexuosa</i>         | 51°55'14''N              | 6°14'30''E | 2013 | 504                    |
| Buunderkamp                     | Scots pine forest   | <i>Vaccinium myrtillus</i>          | 52°00'56''N              | 5°44'50''E | 2013 | 504                    |
| Duin en Kruidberg               | Mixed forest        | <i>Calamagrostis epigejos</i>       | 52°26'16''N              | 4°36'18''E | 2013 | 504                    |
| Deelerwoud                      | Scots pine forest   | <i>Vaccinium myrtillus</i>          | 52°05'51''N              | 5°56'42''E | 2014 | 504                    |
| Enkhout                         | Scots pine forest   | <i>Vaccinium myrtillus</i>          | 52°16'25''N              | 5°54'49''E | 2013 | 495 / 504 <sup>c</sup> |
| Herperduin                      | Mixed forest        | <i>Molinia caerulea</i>             | 51°45'33''N              | 5°36'53''E | 2014 | 504                    |
| Halfmijl                        | Mixed forest        | <i>Molinia caerulea</i>             | 51°25'23''N              | 5°19'09''E | 2013 | 504                    |
| Kremboong                       | European oak forest | Fern ( <i>Dryopteris dilatata</i> ) | 52°45'13''N              | 6°31'16''E | 2013 | 504                    |
| Maashorst                       | Mixed forest        | <i>Deschampsia flexuosa</i>         | 51°42'44''N              | 5°35'24''E | 2014 | 504                    |
| Pettemerduin                    | European oak forest | Fern ( <i>Polypodium vulgare</i> )  | 52°46'33''N              | 4°40'19''E | 2014 | 499                    |
| Planken Wambuis                 | Scots pine forest   | <i>Vaccinium myrtillus</i>          | 52°01'54''N              | 5°48'36''E | 2013 | 441                    |
| Rheebruggen                     | European oak forest | Fern ( <i>Dryopteris dilatata</i> ) | 52°46'60''N              | 6°17'44''E | 2014 | 504                    |
| Schoorlse Duinen                | Mixed forest        | <i>Molinia caerulea</i>             | 52°41'47''N              | 4°40'01''E | 2013 | 504                    |
| Stameren                        | Mixed forest        | <i>Deschampsia flexuosa</i>         | 52°03'38''N              | 5°21'01''E | 2014 | 486                    |
| Valenberg                       | Scots pine forest   | <i>Vaccinium myrtillus</i>          | 52°15'33''N              | 5°48'47''E | 2014 | 391                    |
| Vijverhof                       | Mixed forest        | <i>Deschampsia flexuosa</i>         | 52°09'43''N              | 5°13'43''E | 2013 | 507                    |
| Vledderhof                      | European oak forest | Fern ( <i>Dryopteris dilatata</i> ) | 52°52'46''N              | 6°14'25''E | 2014 | 504                    |
| Zwanemeerbos                    | European oak forest | Fern ( <i>Pteridium aquilinum</i> ) | 53°00'46''N              | 6°45'19''E | 2013 | 504                    |

<sup>a</sup> The most dominant plant species in the herbaceous layer, different fern species were combined into one vegetation type.

<sup>b</sup> Coordinates as measured with a handheld GPS (Garmin eTrex 20) in the plot centre.

<sup>c</sup> The number of camera trapping days outside of the enclosure (left) and inside the enclosure (right).
