# Supplementary material for: Cascading effects of predator activity on tick-borne disease risk
Source: PubMed Central journal article supplement (PMC5543215; doi:10.1098/rspb.2017.0453), 2017-07-19
Supplement: rspb20170453supp2.pdf [file rspb20170453supp2.pdf]

Supplementary material belonging to the manuscript: Hofmeester, T.R., Jansen, P.A., Wijnen, H.J., Coipan, E.C., Fonville, M., Prins, H.H.T., Sprong, H., and van Wieren, S.E. Cascading effects of predator activity on tick-borne disease risk. *Proceedings of the Royal Society B: Biological sciences*. DOI: 10.1098/rspb.2017.0453

Table S2. Estimated Effective Detection Distances (EDD), for the medium-sized to large mammal species photographed with camera traps, per habitat type.

| Species                                                | Body mass <sup>a</sup> (kg) | EDD (m) by Habitat <sup>b</sup> |                 |                 |                 |                 |
|--------------------------------------------------------|-----------------------------|---------------------------------|-----------------|-----------------|-----------------|-----------------|
|                                                        |                             | CE <sup>c</sup>                 | DF <sup>c</sup> | FE <sup>c</sup> | MC <sup>c</sup> | VM <sup>c</sup> |
| <b>Eurasian red squirrel (<i>Sciurus vulgaris</i>)</b> | 0.3                         | 4.0                             | 3.0             | 2.7             | 2.5             | 2.4             |
| <b>European badger (<i>Meles meles</i>)</b>            | 11.8                        |                                 | 5.4             | 5.4             | 5.5             | 4.5             |
| <b>European hare (<i>Lepus europaeus</i>)</b>          | 3.8                         | 4.9                             | 4.5             | 4.3             | 4.3             | 3.7             |
| <b>European hedgehog (<i>Erinaceus europaeus</i>)</b>  | 0.8                         | 4.3                             |                 | 3.2             | 3.0             |                 |
| <b>European pine marten (<i>Martes martes</i>)</b>     | 1.3                         | 4.5                             | 3.7             | 3.5             | 3.4             | 3.0             |
| <b>European Rabbit (<i>Oryctolagus cuniculus</i>)</b>  | 1.6                         |                                 | 3.8             |                 | 3.5             |                 |
| <b>Fallow deer (<i>Dama dama</i>)</b>                  | 57.2                        | 6.2                             |                 | 7.2             |                 | 5.9             |
| <b>Feral house cat (<i>Felis catus</i>)</b>            | 2.9                         |                                 | 4.3             | 4.1             | 4.0             |                 |
| <b>Polecat (<i>Mustela putorius</i>)</b>               | 1.0                         | 4.4                             |                 | 3.4             | 3.2             |                 |
| <b>Red deer (<i>Cervus elaphus</i>)</b>                | 240.9                       |                                 |                 |                 |                 | 7.6             |
| <b>Red fox (<i>Vulpes vulpes</i>)</b>                  | 4.8                         | 5.0                             | 4.6             | 4.5             | 4.5             | 3.8             |
| <b>Roe deer (<i>Capreolus capreolus</i>)</b>           | 22.5                        | 5.7                             | 6.0             | 6.1             | 6.3             | 5.0             |
| <b>Stone marten (<i>Martes foina</i>)</b>              | 1.7                         |                                 | 3.9             | 3.7             | 3.6             |                 |
| <b>Wild boar (<i>Sus scrofa</i>)</b>                   | 84.5                        |                                 |                 |                 |                 | 6.3             |

<sup>a</sup> Body mass values are taken from the PanTHERIA database. Jones K.E. et al. 2009 PanTHERIA: a species-level database of life history, ecology, and geography of extant and recently extinct mammals. *Ecology* **90**(9), 2648-2648. (doi:10.1890/08-1494.1).

<sup>b</sup> The abbreviations are related to the dominant species of vegetation in the herbaceous layer in the 1 hectare forest plot. CE = *Calamagrostis epigejos*, DF = *Deschampsia flexuosa*, FE = fern species (*Dryopteris dilatata*, *Polypodium vulgare* or *Pteridium aquilinum*), MC = *Molinia caerulea*, and VM = *Vaccinium myrtillus*.

<sup>c</sup> Estimates of EDD given are based on a point model with a half-normal detection probability function with log<sub>10</sub>-transformed body mass as covariate.
