# Supplementary material for: Cascading effects of predator activity on tick-borne disease risk
Source: PubMed Central journal article supplement (PMC5543215; doi:10.1098/rspb.2017.0453), 2017-07-19
Supplement: rspb20170453supp3.pdf [file rspb20170453supp3.pdf]

Supplementary material belonging to the manuscript: Hofmeester, T.R., Jansen, P.A., Wijnen, H.J., Coipan, E.C., Fonville, M., Prins, H.H.T., Sprong, H., and van Wieren, S.E. Cascading effects of predator activity on tick-borne disease risk. *Proceedings of the Royal Society B: Biological sciences*. DOI: 10.1098/rspb.2017.0453

### Supplementary material S3.

Description and results of the basis set of d-separation (d-sep) independence claims testing the indirect correlation between predator activity, larval *Ixodes ricinus* density, rodent density, larval burden on rodents, the density of questing nymphs (DON) and the density of infected nymphs (DIN) for *Borrelia afzelii*, *B. miyamotoi* and *Candidatus Neohhrlichia mikurensis*.  $X_1$  = Red fox (*Vulpes vulpes*) activity,  $X_2$  = Stone marten (*Martes foina*) activity,  $X_3$  = Larval density,  $X_4$  = Rodent density,  $X_5$  = Average larval burden on rodents,  $X_6$  = DON,  $X_7$  = DIN *B. afzelii*,  $X_8$  = DIN *B. miyamotoi* and  $X_9$  = DIN *Ca. N. mikurensis*; VT = Vegetation type.

Table S5.1. The basis set of d-separation (d-sep) claims for Bank vole models.

| D-sep claim of independence <sup>a</sup> | Mixed model <sup>a</sup>                 | Null probability (distribution) |
|------------------------------------------|------------------------------------------|---------------------------------|
| $(X_3, X_4)   \{X_1, X_2\}$              | $X_4 \sim X_1 + X_2 + X_3 + (1 Year/VT)$ | 0.87 (neg. binomial)            |
| $(X_1, X_6)   \{X_4, X_5\}$              | $X_6 \sim X_1 + X_4 + X_5 + (1 Year/VT)$ | 0.94 (neg. binomial)            |
| $(X_2, X_6)   \{X_4, X_5\}$              | $X_6 \sim X_2 + X_4 + X_5 + (1 Year/VT)$ | 0.11 (neg. binomial)            |
| $(X_3, X_6)   \{X_4, X_5\}$              | $X_6 \sim X_3 + X_4 + X_5 + (1 Year/VT)$ | <0.001 (neg. binomial)          |
| $(X_1, X_7)   \{X_4, X_5\}$              | $X_7 \sim X_1 + X_4 + X_5 + (1 Year/VT)$ | 0.25 (neg. binomial)            |
| $(X_2, X_7)   \{X_4, X_5\}$              | $X_7 \sim X_2 + X_4 + X_5 + (1 Year/VT)$ | 0.66 (neg. binomial)            |
| $(X_3, X_7)   \{X_4, X_5\}$              | $X_7 \sim X_3 + X_4 + X_5 + (1 Year/VT)$ | 0.49 (neg. binomial)            |
| $(X_1, X_8)   \{X_4, X_5\}$              | $X_8 \sim X_1 + X_4 + X_5 + (1 Year/VT)$ | 0.97 (neg. binomial)            |
| $(X_2, X_8)   \{X_4, X_5\}$              | $X_8 \sim X_2 + X_4 + X_5 + (1 Year/VT)$ | 0.92 (neg. binomial)            |
| $(X_3, X_8)   \{X_4, X_5\}$              | $X_8 \sim X_3 + X_4 + X_5 + (1 Year/VT)$ | 0.20 (neg. binomial)            |
| $(X_1, X_9)   \{X_4, X_5\}$              | $X_9 \sim X_1 + X_4 + X_5 + (1 Year/VT)$ | 0.96 (neg. binomial)            |
| $(X_2, X_9)   \{X_4, X_5\}$              | $X_9 \sim X_2 + X_4 + X_5 + (1 Year/VT)$ | 0.99 (neg. binomial)            |
| $(X_3, X_9)   \{X_4, X_5\}$              | $X_9 \sim X_3 + X_4 + X_5 + (1 Year/VT)$ | 0.22 (neg. binomial)            |

Table S5.2. The basis set of d-separation (d-sep) claims for Wood mouse models.

| D-sep claim of independence <sup>a</sup> | Mixed model <sup>a</sup>                 | Null probability (distribution) |
|------------------------------------------|------------------------------------------|---------------------------------|
| $(X_3, X_4)   \{X_1, X_2\}$              | $X_4 \sim X_1 + X_2 + X_3 + (1 Year/VT)$ | 0.54 (neg. binomial)            |
| $(X_1, X_6)   \{X_4, X_5\}$              | $X_6 \sim X_1 + X_4 + X_5 + (1 Year/VT)$ | 0.85 (neg. binomial)            |
| $(X_2, X_6)   \{X_4, X_5\}$              | $X_6 \sim X_2 + X_4 + X_5 + (1 Year/VT)$ | 0.12 (neg. binomial)            |
| $(X_3, X_6)   \{X_4, X_5\}$              | $X_6 \sim X_3 + X_4 + X_5 + (1 Year/VT)$ | <0.001 (neg. binomial)          |
| $(X_1, X_7)   \{X_4, X_5\}$              | $X_7 \sim X_1 + X_4 + X_5 + (1 Year/VT)$ | 0.09 (neg. binomial)            |
| $(X_2, X_7)   \{X_4, X_5\}$              | $X_7 \sim X_2 + X_4 + X_5 + (1 Year/VT)$ | 0.72 (neg. binomial)            |
| $(X_3, X_7)   \{X_4, X_5\}$              | $X_7 \sim X_3 + X_4 + X_5 + (1 Year/VT)$ | 0.27 (neg. binomial)            |
| $(X_1, X_8)   \{X_4, X_5\}$              | $X_8 \sim X_1 + X_4 + X_5 + (1 Year/VT)$ | 0.59 (neg. binomial)            |
| $(X_2, X_8)   \{X_4, X_5\}$              | $X_8 \sim X_2 + X_4 + X_5 + (1 Year/VT)$ | 0.73 (neg. binomial)            |
| $(X_3, X_8)   \{X_4, X_5\}$              | $X_8 \sim X_3 + X_4 + X_5 + (1 Year/VT)$ | 0.12 (neg. binomial)            |
| $(X_1, X_9)   \{X_4, X_5\}$              | $X_9 \sim X_1 + X_4 + X_5 + (1 Year/VT)$ | 0.54 (neg. binomial)            |
| $(X_2, X_9)   \{X_4, X_5\}$              | $X_9 \sim X_2 + X_4 + X_5 + (1 Year/VT)$ | 0.83 (neg. binomial)            |
| $(X_3, X_9)   \{X_4, X_5\}$              | $X_9 \sim X_3 + X_4 + X_5 + (1 Year/VT)$ | 0.08 (neg. binomial)            |
