# Supplementary material for: Cascading effects of predator activity on tick-borne disease risk
Source: PubMed Central journal article supplement (PMC5543215; doi:10.1098/rspb.2017.0453), 2017-07-19
Supplement: rspb20170453supp4.pdf [file rspb20170453supp4.pdf]

Supplementary material belonging to the manuscript: Hofmeester, T.R., Jansen, P.A., Wijnen, H.J., Coipan, E.C., Fonville, M., Prins, H.H.T., Sprong, H., and van Wieren, S.E. Cascading effects of predator activity on tick-borne disease risk. *Proceedings of the Royal Society B: Biological sciences*. DOI: 10.1098/rspb.2017.0453

#### Supplementary material S4.

Full model results of exploratory analyses testing the correlations between predator activity and rodent characteristics (density, larval and nymphal burden). All models were generalized linear mixed models with a negative binomial distribution and log link function with a random intercept per year. Values given are estimates of the standardized correlation coefficient for passage rate per species.

Comparisons of model fit are given by the difference in small-sample-size corrected Akaike Information Criterion ( $\Delta\text{AICc}$ ) and calculated model weight ( $\omega_m$ ). Only models with  $\Delta\text{AICc} < 4$  are shown. Significant coefficient estimates are presented in bold, \* for  $p < 0.05$ , \*\* for  $p < 0.01$ , \*\*\* for  $p < 0.001$ .

Table S4.1. Model outcomes for the correlation between predator activity and Bank vole (*Myodes glareolus*) density.

| Model | Intercept      | Pine marten <sup>a</sup> | Polecat <sup>b</sup> | Red fox <sup>c</sup> | Stone marten <sup>d</sup> | $\Delta\text{AICc}$ | $\omega_m$ |
|-------|----------------|--------------------------|----------------------|----------------------|---------------------------|---------------------|------------|
| 1     | <b>3.13***</b> | <b>1.45*</b>             |                      |                      |                           | 0                   | 0.351      |
| 2     | <b>3.28***</b> |                          |                      |                      |                           | 0.97                | 0.216      |
| 3     | <b>3.23***</b> |                          |                      | 0.65                 |                           | 2.80                | 0.086      |
| 4     | <b>3.10***</b> | 1.48                     | 0.56                 |                      |                           | 3.36                | 0.065      |
| 5     | <b>3.11***</b> | 1.53                     |                      |                      | -0.51                     | 3.49                | 0.061      |
| 6     | <b>3.11***</b> | 1.27                     |                      | 0.37                 |                           | 3.50                | 0.061      |
| 7     | <b>3.27***</b> |                          | 0.64                 |                      |                           | 3.77                | 0.053      |

<sup>a</sup> *Martes martes*; <sup>b</sup> *Mustela putorius*; <sup>c</sup> *Vulpes vulpes*; <sup>d</sup> *Martes foina*

Table S4.2. Model outcomes for the correlation between predator activity and Wood mouse (*Apodemus sylvaticus*) density.

| Model | Intercept      | Pine marten | Polecat | Red fox | Stone marten | $\Delta\text{AICc}$ | $\omega_m$ |
|-------|----------------|-------------|---------|---------|--------------|---------------------|------------|
| 1     | <b>2.51***</b> |             | 1.22    |         |              | 0                   | 0.265      |
| 2     | <b>2.60***</b> |             |         |         |              | 0.47                | 0.209      |
| 3     | <b>2.56***</b> |             |         | 0.73    |              | 1.73                | 0.112      |
| 4     | <b>2.56***</b> |             |         |         | 0.87         | 2.04                | 0.095      |
| 5     | <b>2.50***</b> |             | 0.94    | 0.46    |              | 2.93                | 0.061      |
| 6     | <b>2.49***</b> |             | 1.03    |         | 0.57         | 2.98                | 0.060      |
| 7     | <b>2.59***</b> | 0.39        |         |         |              | 3.23                | 0.053      |
| 8     | <b>2.51***</b> | 0.22        | 1.16    |         |              | 3.61                | 0.044      |
| 9     | <b>2.52***</b> |             |         | 0.68    | 0.79         | 3.94                | 0.037      |

Table S4.3. Model outcomes for the correlation between predator activity and larval burden on Bank voles.

| Model | Intercept      | Pine marten | Polecat | Red fox        | Stone marten  | $\Delta AICc$ | $\omega_m$ |
|-------|----------------|-------------|---------|----------------|---------------|---------------|------------|
| 1     | <b>2.67***</b> |             |         | <b>-0.99**</b> | <b>-0.91*</b> | 0             | 0.243      |
| 2     | <b>2.75***</b> |             |         | <b>-0.85*</b>  |               | 0.01          | 0.242      |
| 3     | <b>2.83***</b> |             |         |                |               | 0.71          | 0.171      |
| 4     | <b>2.77***</b> |             |         |                | -0.72         | 2.26          | 0.079      |
| 5     | <b>2.74***</b> |             | -0.52   | -0.84          |               | 2.74          | 0.062      |
| 6     | <b>2.82***</b> |             | -0.56   |                |               | 2.83          | 0.059      |

Table S4.4. Model outcomes for the correlation between predator activity and larval burden on Wood mice.

| Model | Intercept      | Pine marten | Polecat | Red fox         | Stone marten    | $\Delta AICc$ | $\omega_m$ |
|-------|----------------|-------------|---------|-----------------|-----------------|---------------|------------|
| 1     | <b>3.23***</b> |             |         | <b>-1.60***</b> | <b>-1.32***</b> | 0             | 0.606      |
| 2     | <b>3.38***</b> |             |         | <b>-1.48**</b>  |                 | 3.31          | 0.116      |

Table S4.5. Model outcomes for the correlation between predator activity and nymphal burden on Bank voles.

| Model | Intercept      | Pine marten | Polecat | Red fox | Stone marten | $\Delta AICc$ | $\omega_m$ |
|-------|----------------|-------------|---------|---------|--------------|---------------|------------|
| 1     | <b>-1.54**</b> |             |         |         |              | 0             | 0.595      |
| 2     | <b>-1.65**</b> | -1.04       |         |         |              | 2.91          | 0.139      |

Table S4.6. Model outcomes for the correlation between predator activity and nymphal burden on Wood mice.

| Model | Intercept | Pine marten | Polecat | Red fox | Stone marten | $\Delta AICc$ | $\omega_m$ |
|-------|-----------|-------------|---------|---------|--------------|---------------|------------|
| 1     | -0.54     |             |         | -1.29   |              | 0             | 0.263      |
| 2     | -0.38     |             |         |         |              | 0.01          | 0.261      |
| 3     | -0.49     |             | -1.12   |         |              | 1.43          | 0.129      |
| 4     | -0.61     |             | -0.87   | -1.17   |              | 2.74          | 0.067      |
| 5     | -0.39     |             |         |         | -0.30        | 3.04          | 0.058      |
| 6     | -0.57     |             |         | -1.38   | -0.49        | 3.15          | 0.054      |
| 7     | -0.38     | -0.096      |         |         |              | 3.23          | 0.052      |
| 8     | -0.54     | -0.024      |         | -1.29   |              | 3.76          | 0.040      |
