# Supplementary material for: Cascading effects of predator activity on tick-borne disease risk
Source: PubMed Central journal article supplement (PMC5543215; doi:10.1098/rspb.2017.0453), 2017-07-19

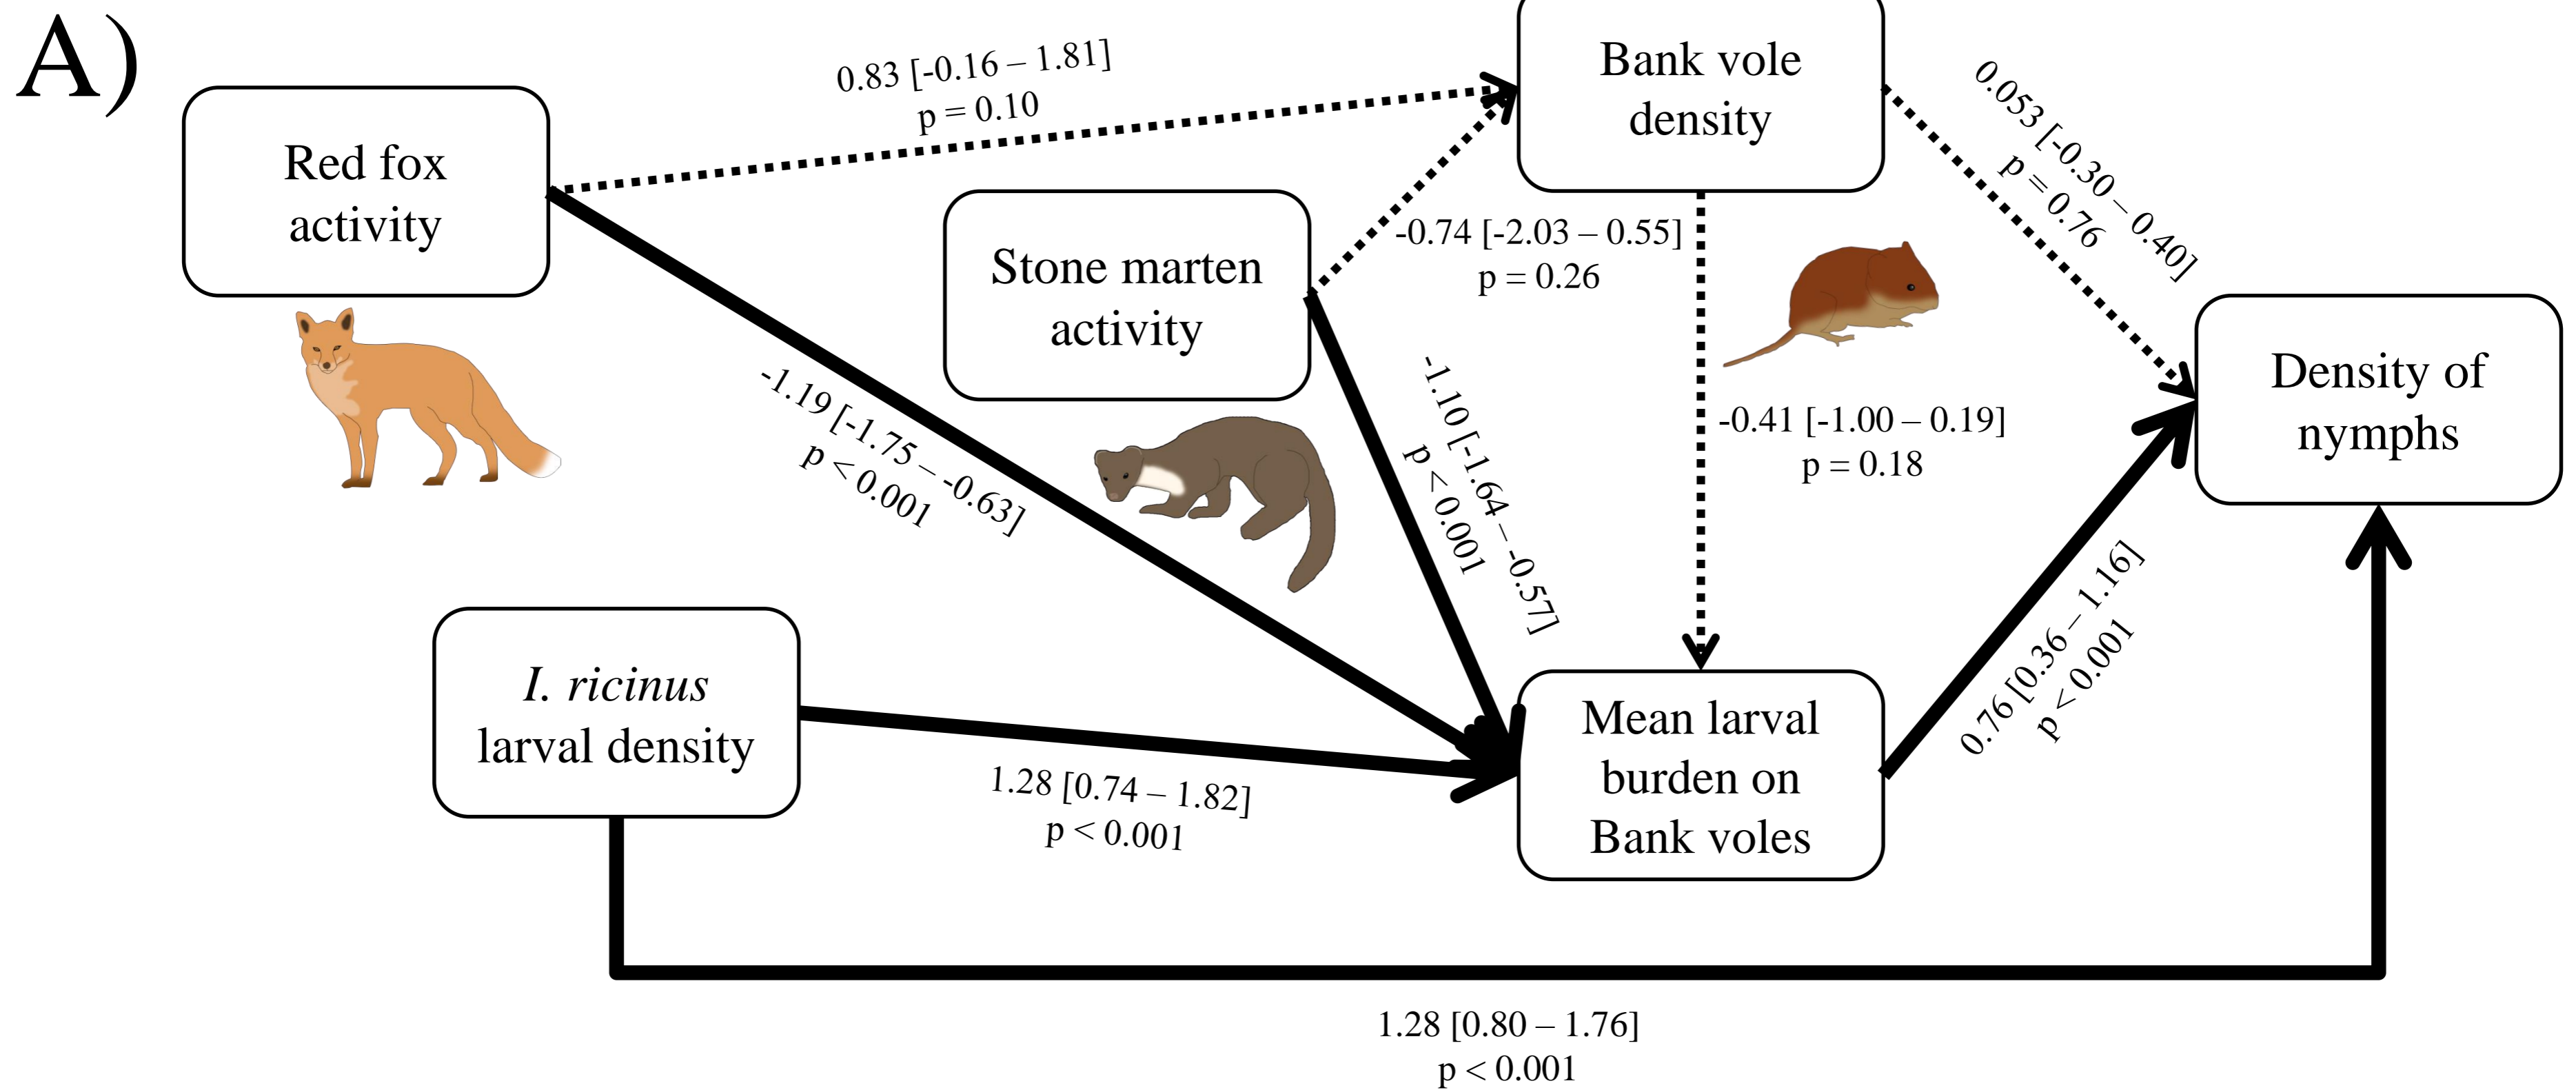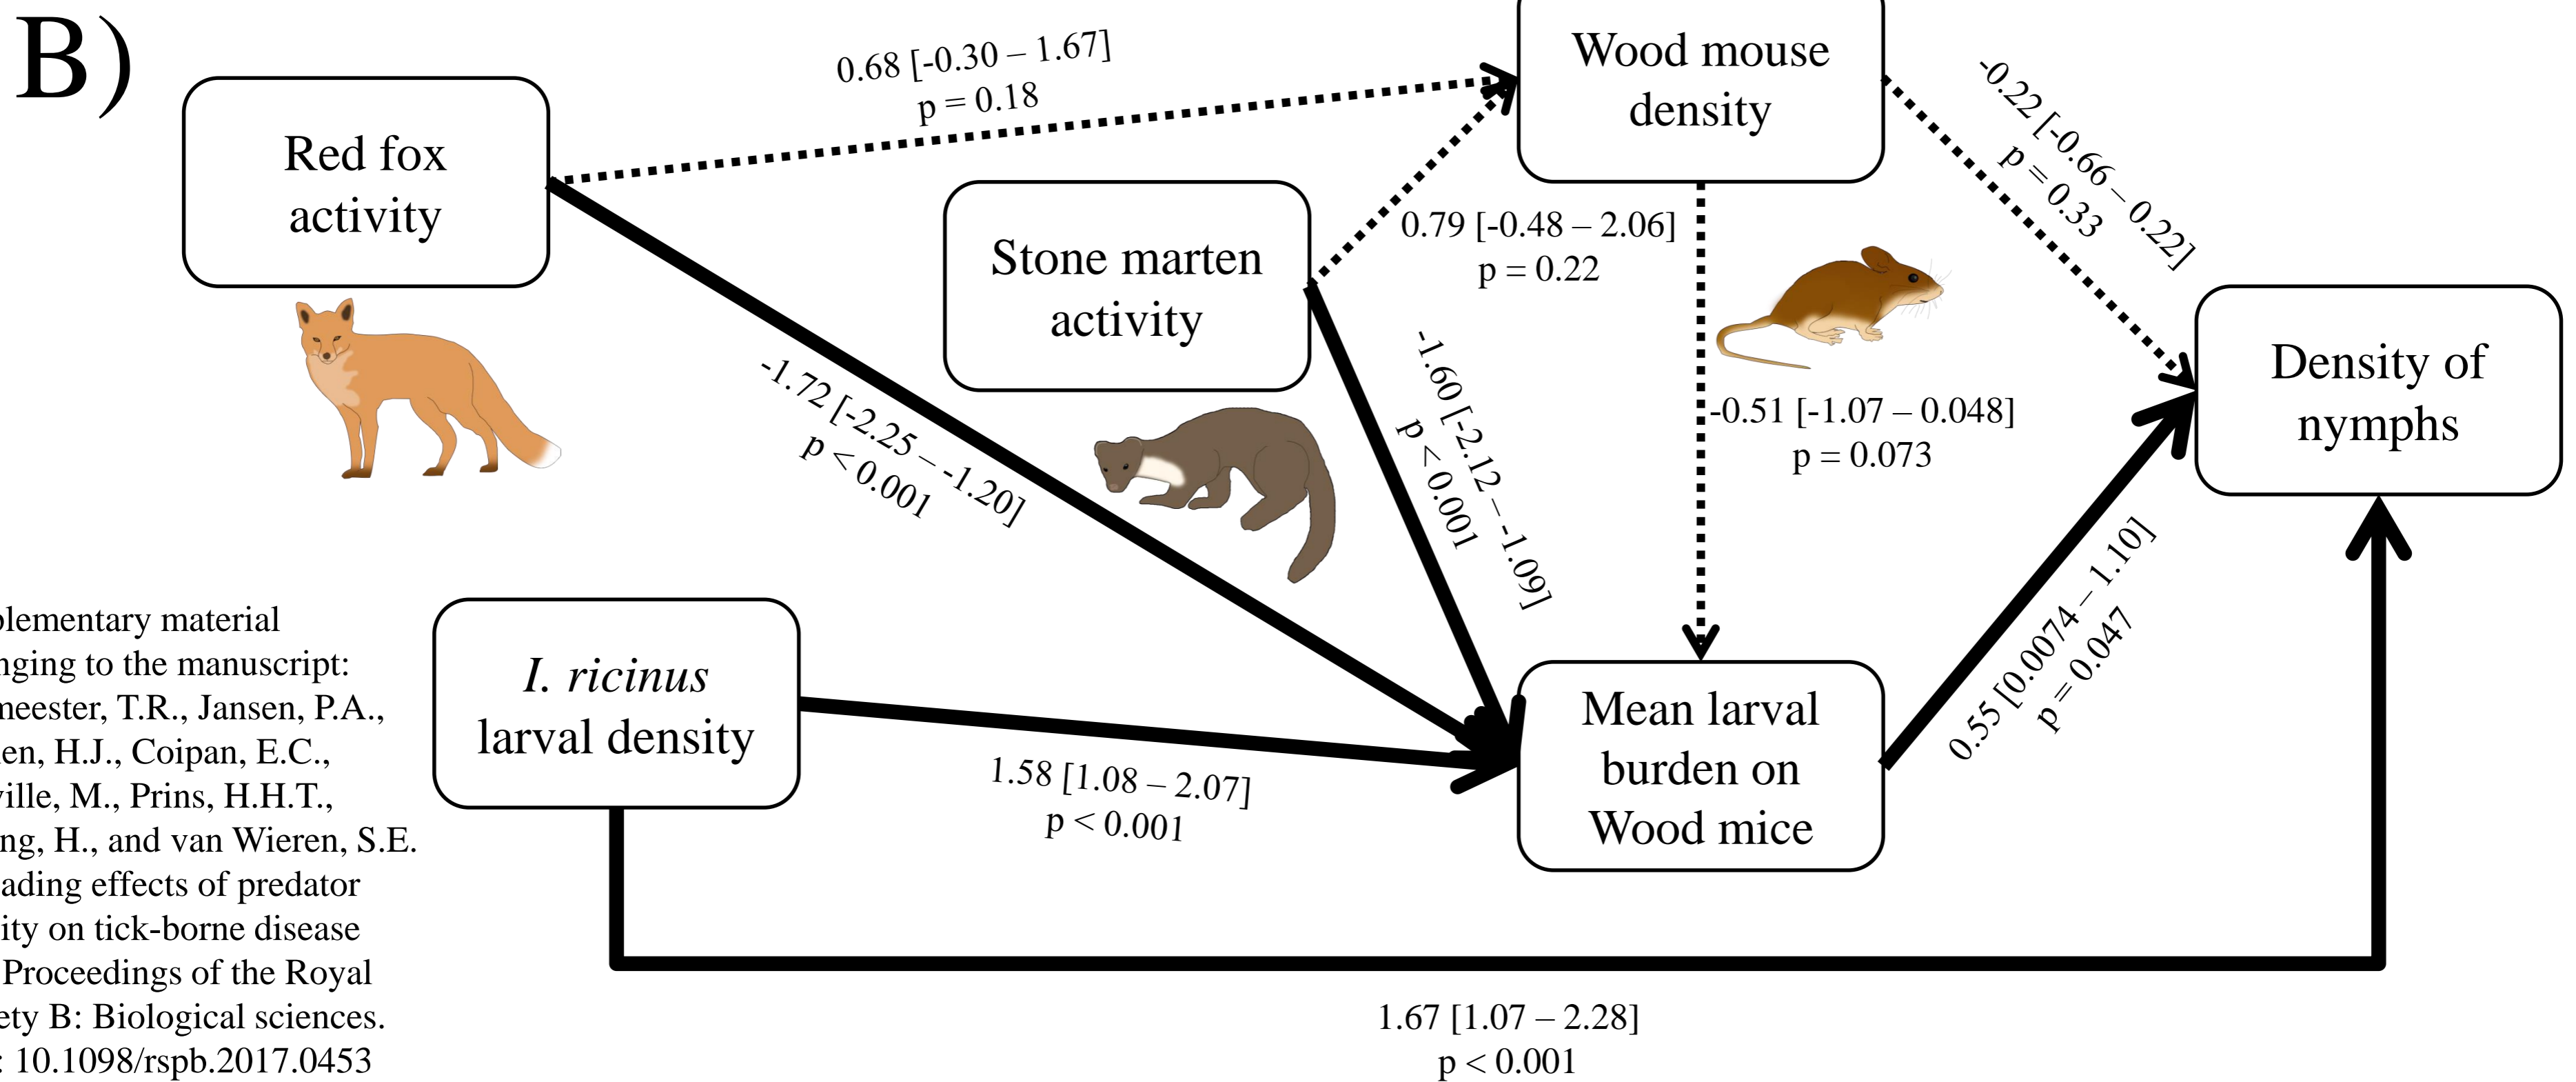

Supplement: rspb20170453supp6.pdf [file rspb20170453supp6.pdf]
